# Supplementary material for: Genome-wide association mapping of salinity tolerance in rice (Oryza sativa)
Source: PubMed Central journal article supplement — DNA Res. 2015 Jan 27;22(2):133–45. doi: 10.1093/dnares/dsu046 (PMC4401324; doi:10.1093/dnares/dsu046), 2015-01-27
Supplement: supp_dsu046_dsu046supp_figures.pdf [file supp_dsu046_dsu046supp_figures.pdf]

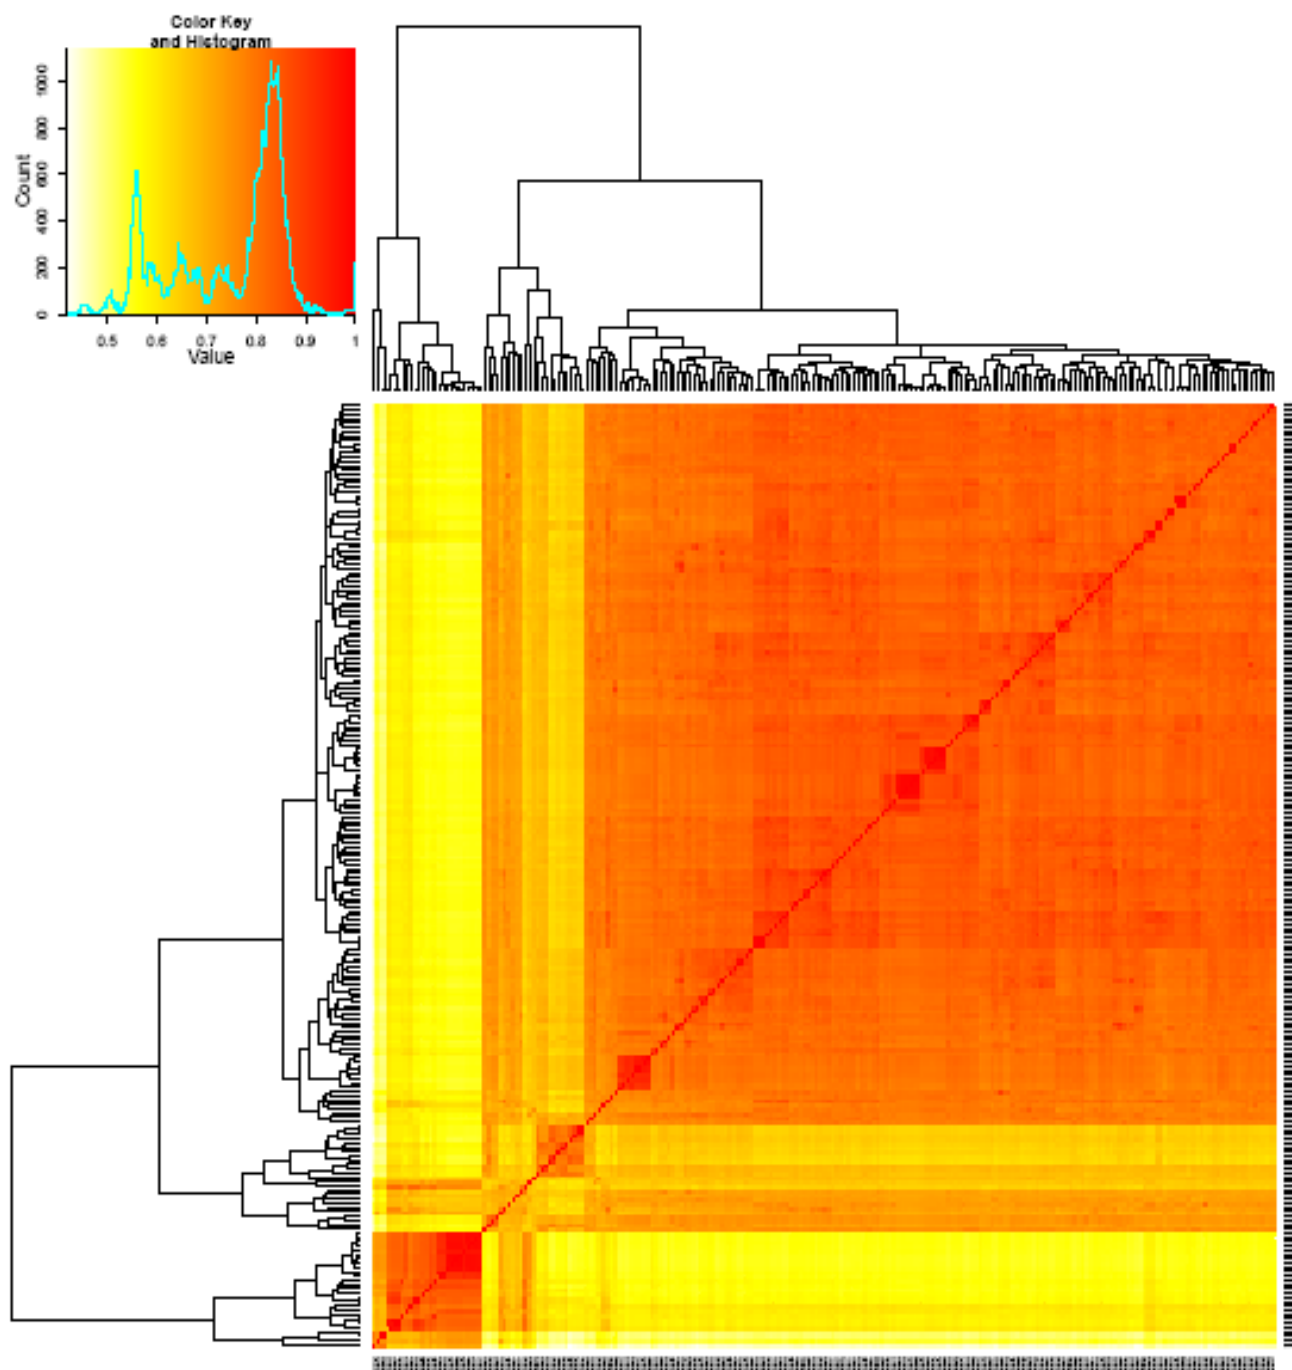

**Supplementary Figure S1.** The kinship association among current association panel based on EMMA algorithm implemented in GAPIT. The kinship values varies from 0 to 1 as shown in the color key and histogram.

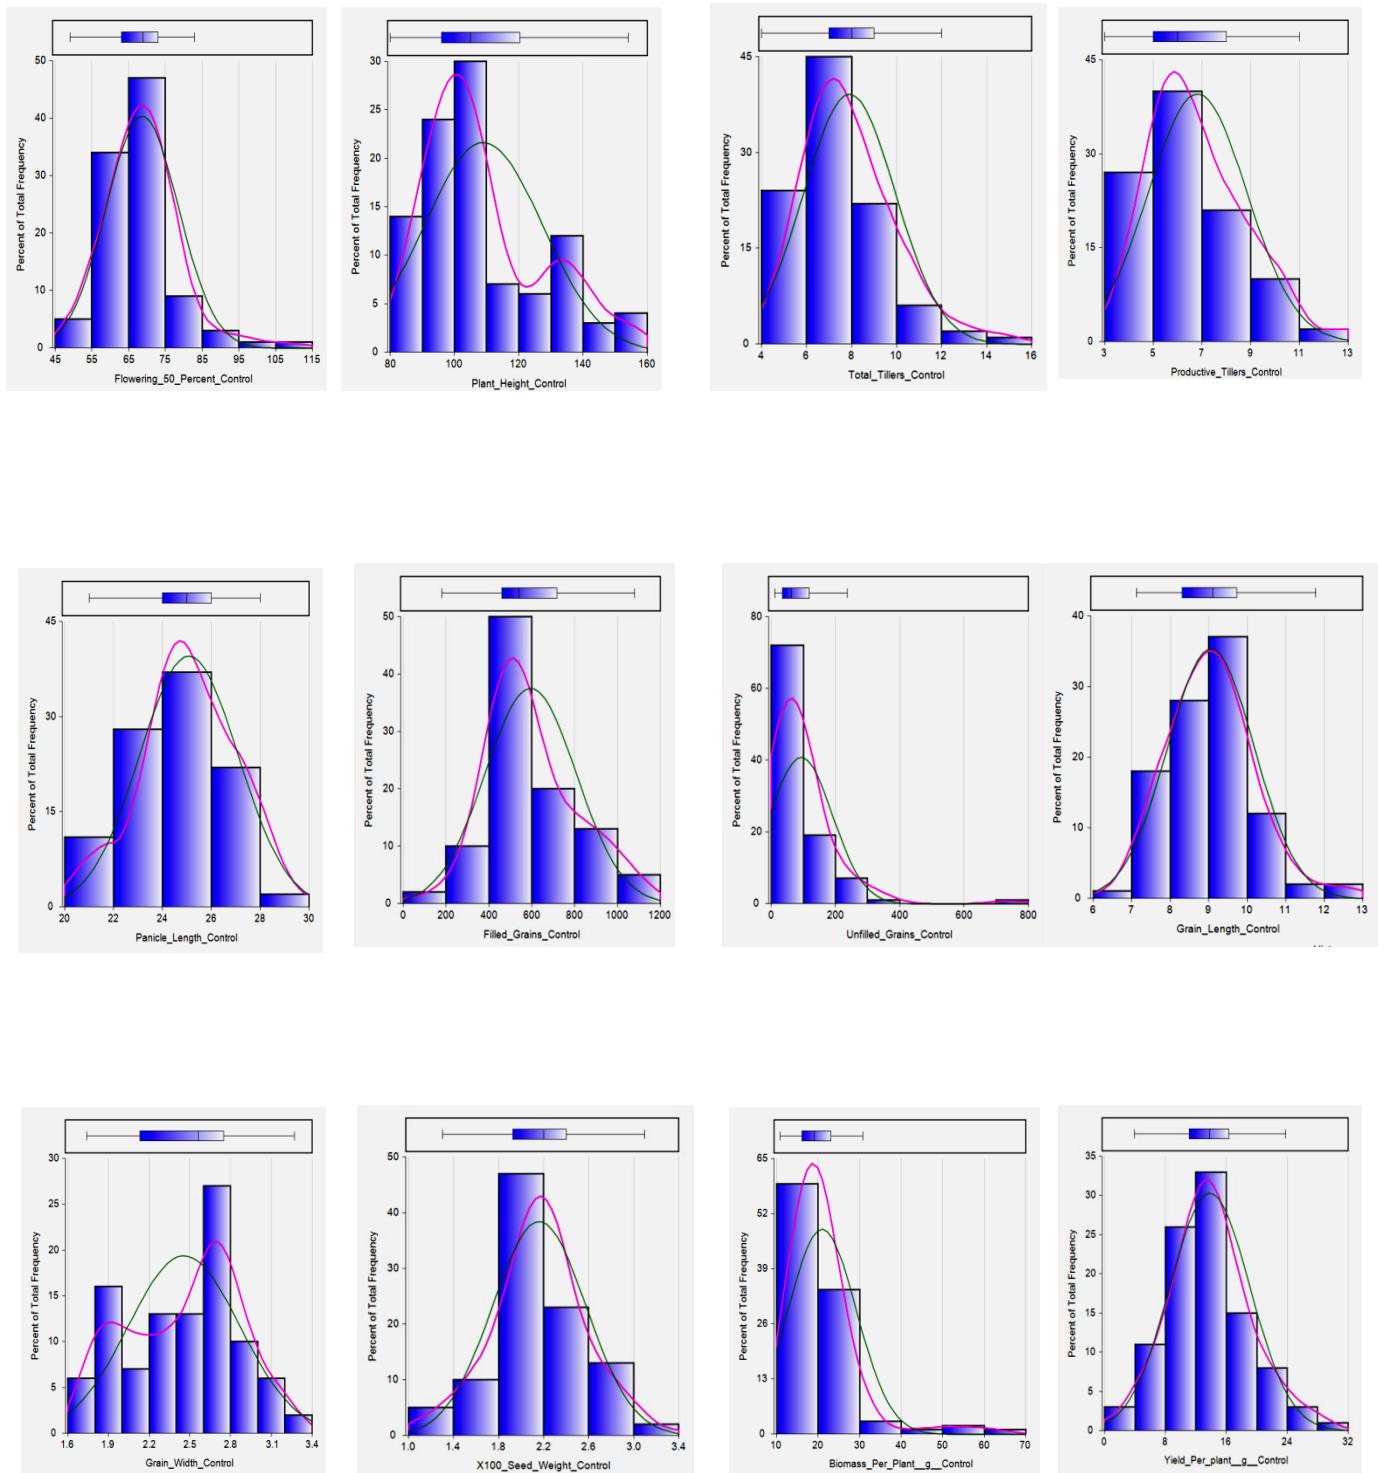

**Supplementary Figure S2a.** A histogram with box plot showing the distribution of 12 traits phenotyped for germplasm set used in the study under control condition.

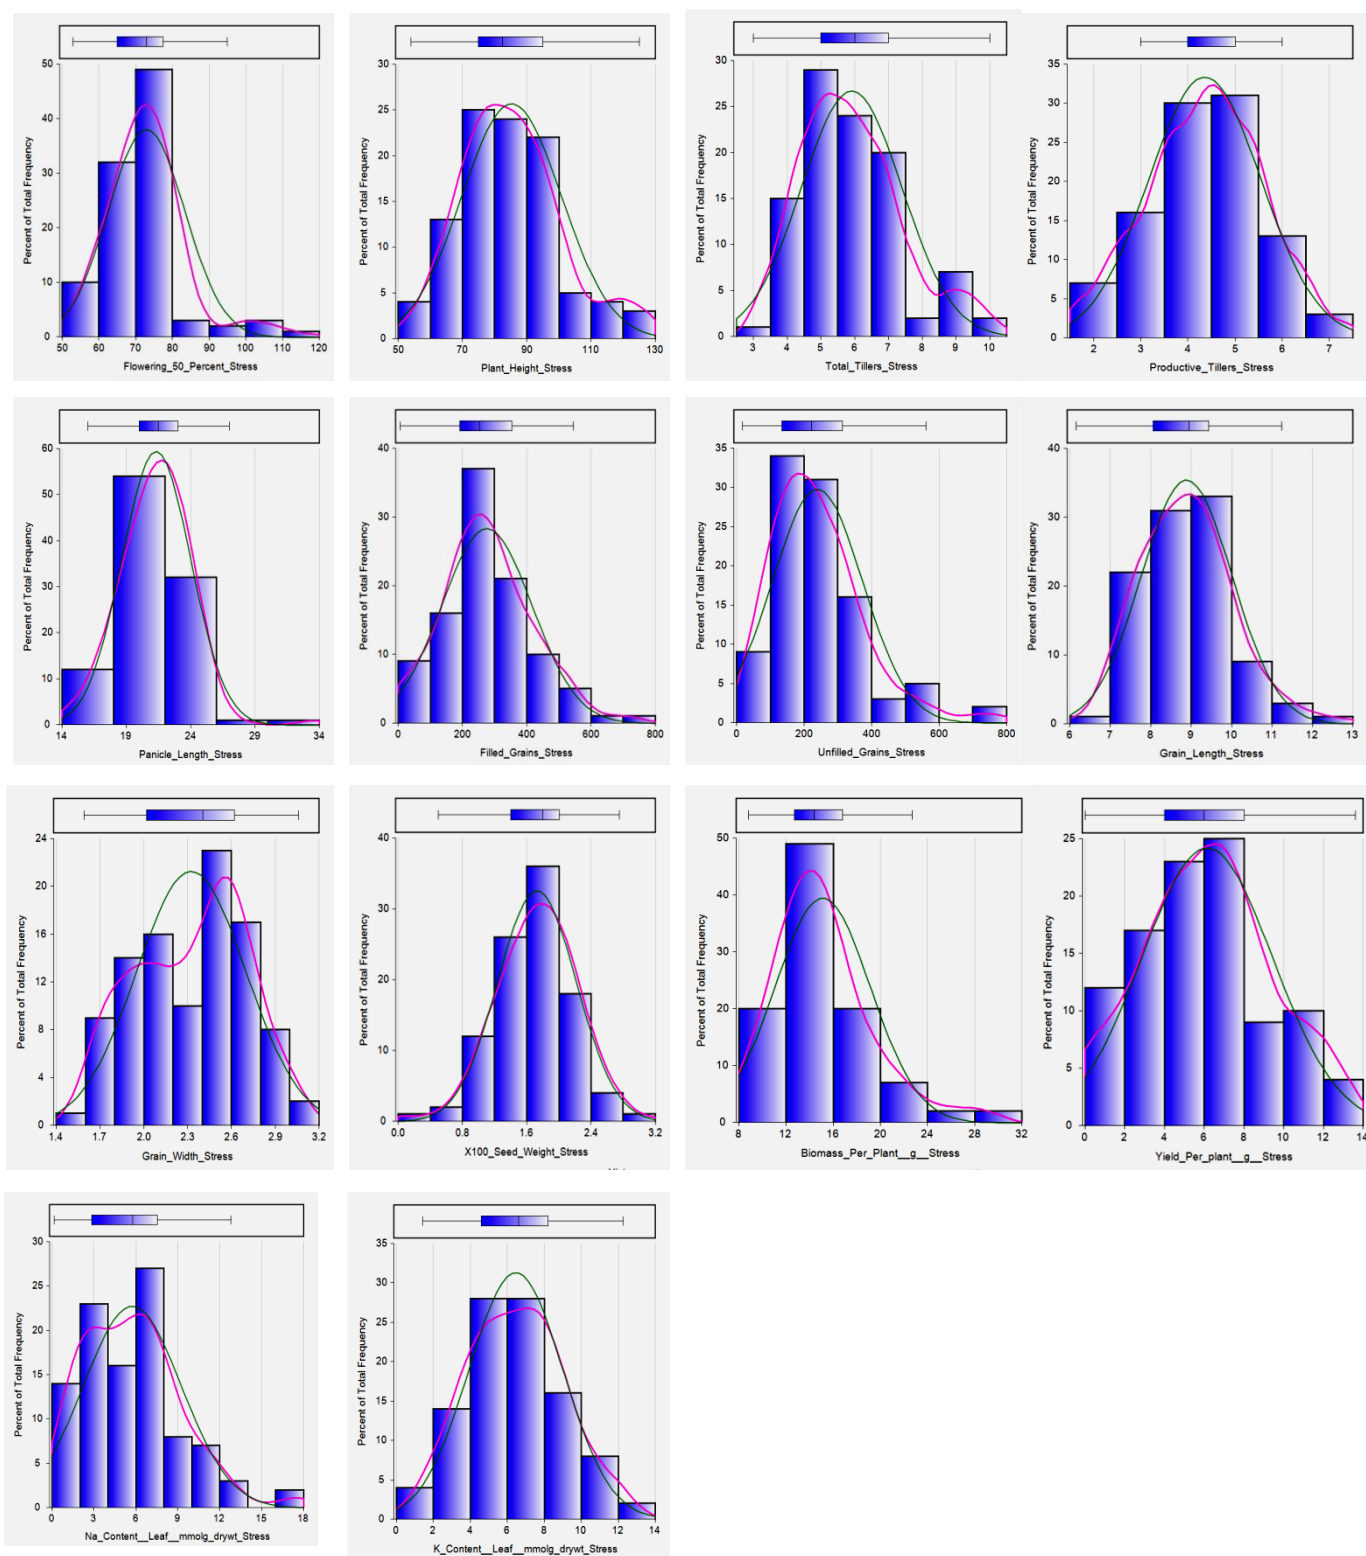

**Supplementary Figure S2b.** A histogram with box plot showing the distribution of 14 traits phenotyped for germplasm set used in the study under salinity stress condition.

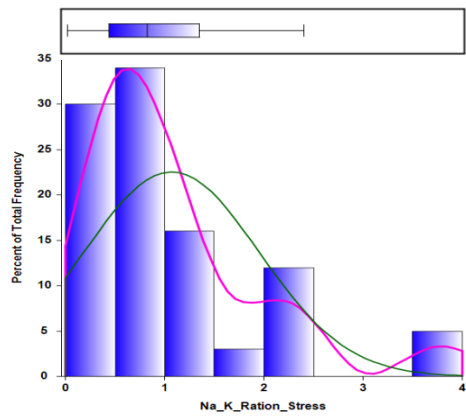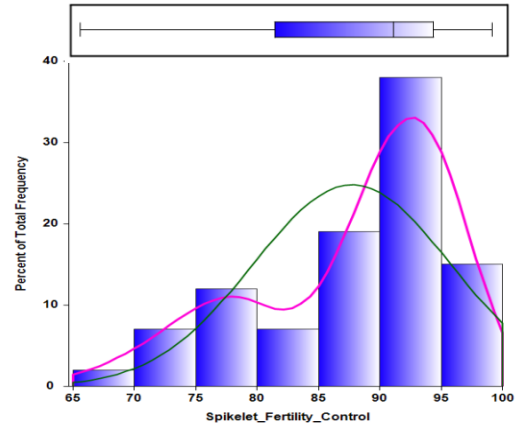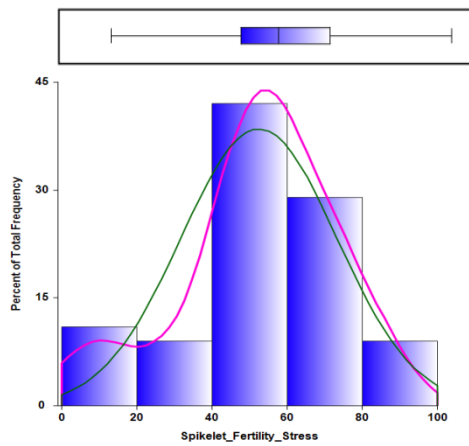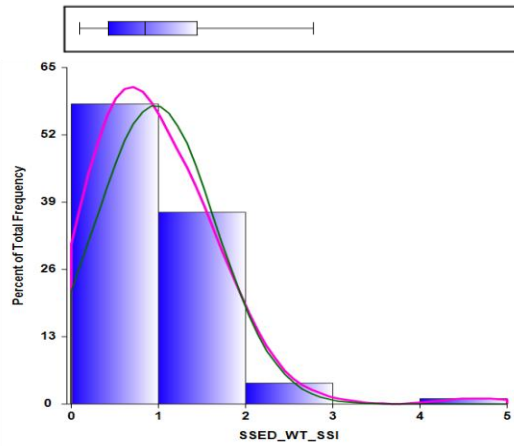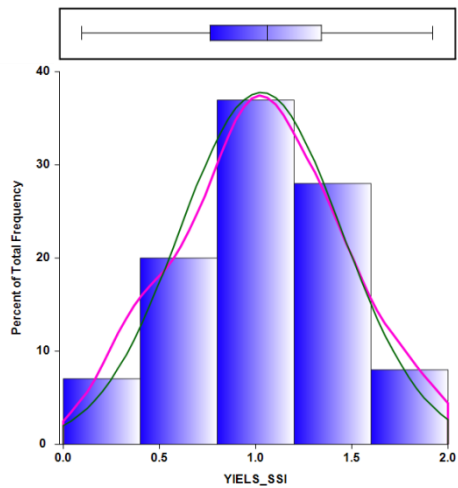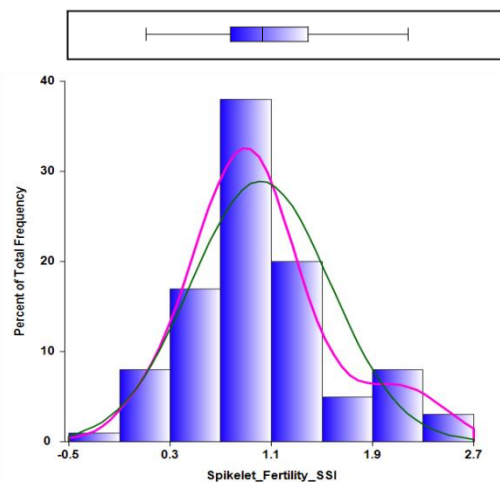

**Supplementary Figure S2c.** A histogram with box plot showing the distribution of derived traits.

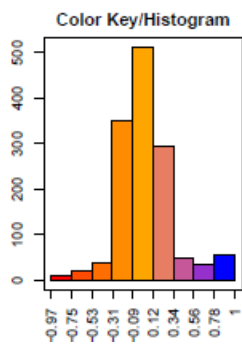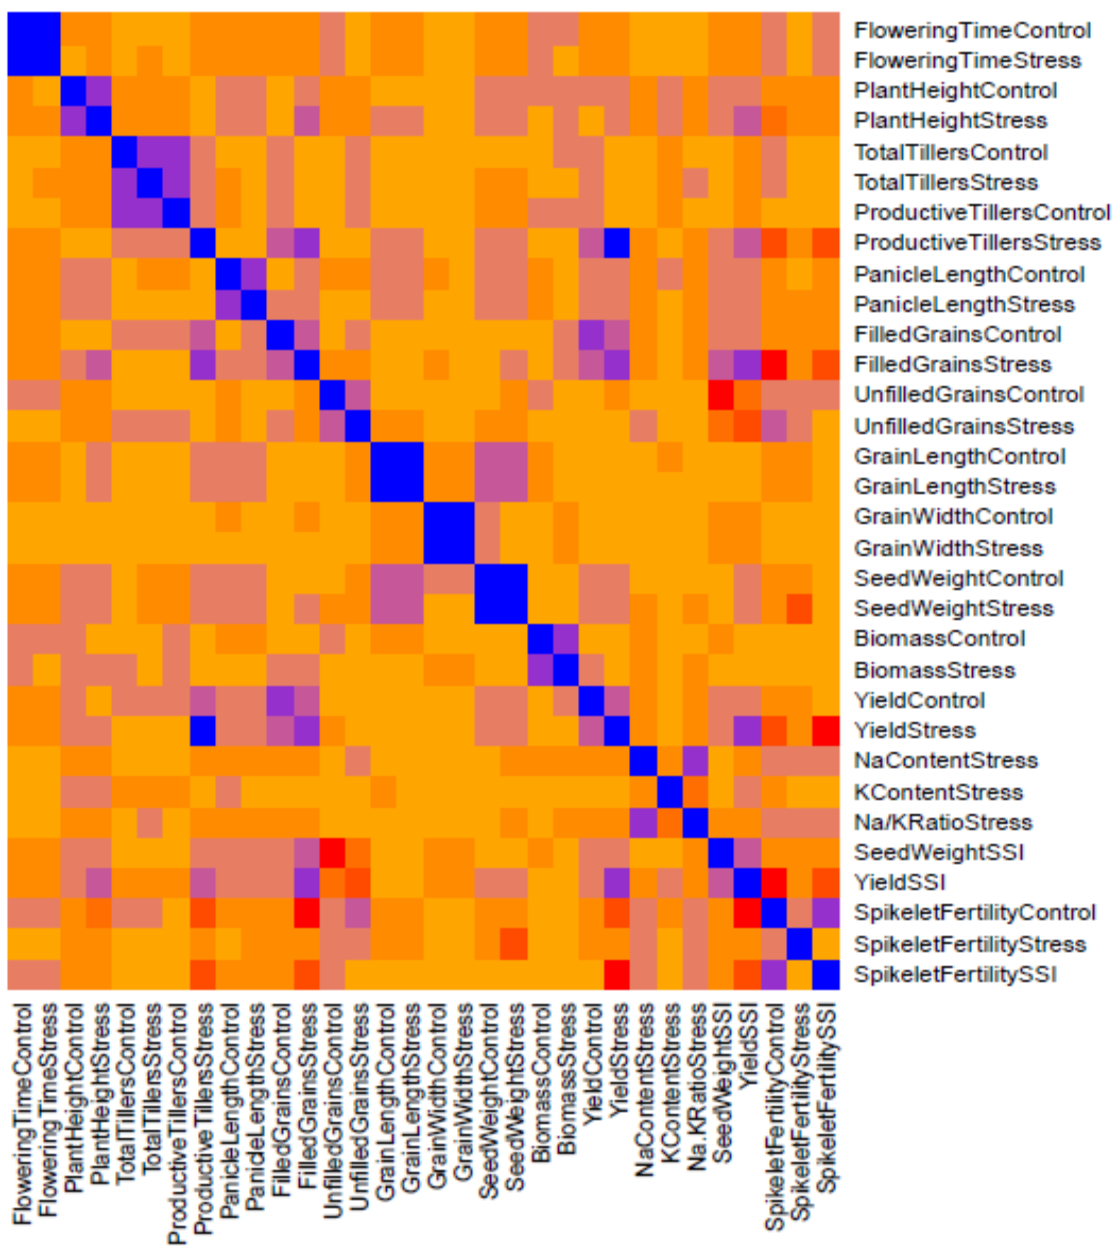

**Supplementary Figure S3.** The Pearson correlation coefficients computed for all the traits measured under control and stress, and susceptibility indices of yield related traits.

**Supplementary Figure S4 to S12. The  $p$ -value of the SNPs and Quantile-Quantile plot of  $p$ -values for traits showed significant association.** (a) Manhattan plot showing the  $P$ -values along the genome from the mixed linear model. (b)  $Q$ - $Q$  plot showing the expected null distribution of  $p$ -values, assuming no associations, represented as a red line and distribution of  $p$ -values observed using the CMLM model represented as a blue line.

### CMLM for plant height under control

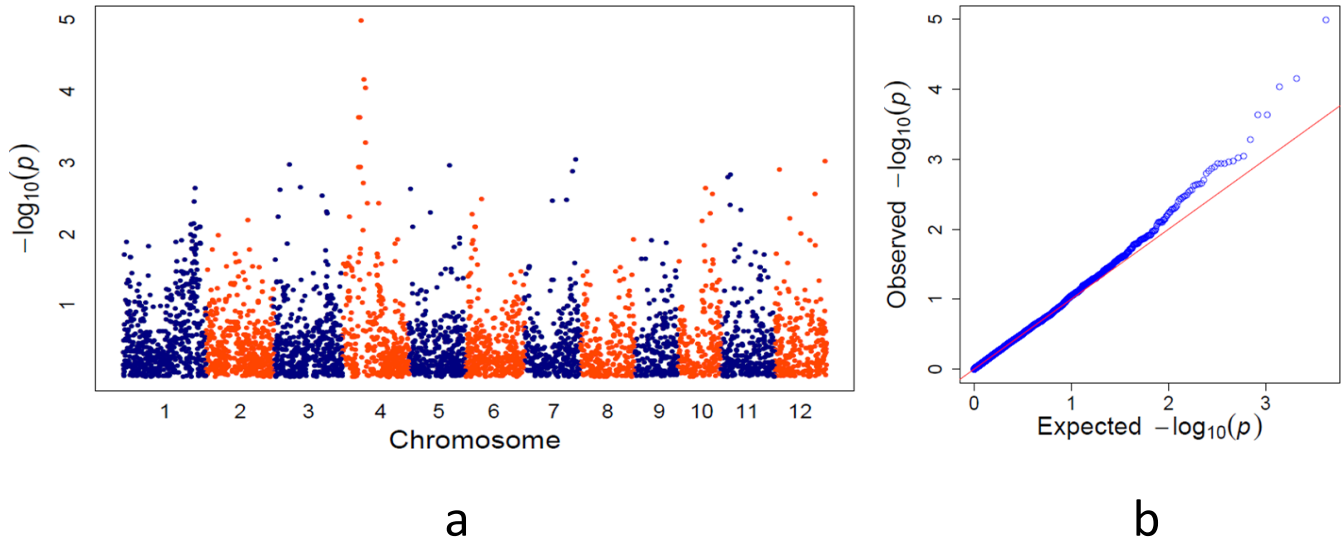

**Supplementary Figure S4.** Manhattan plot (a) and corresponding quantile-quantile plots (b) of  $p$ -values analyzed using mixed model for plant height.

### CMLM for spikelet fertility under control

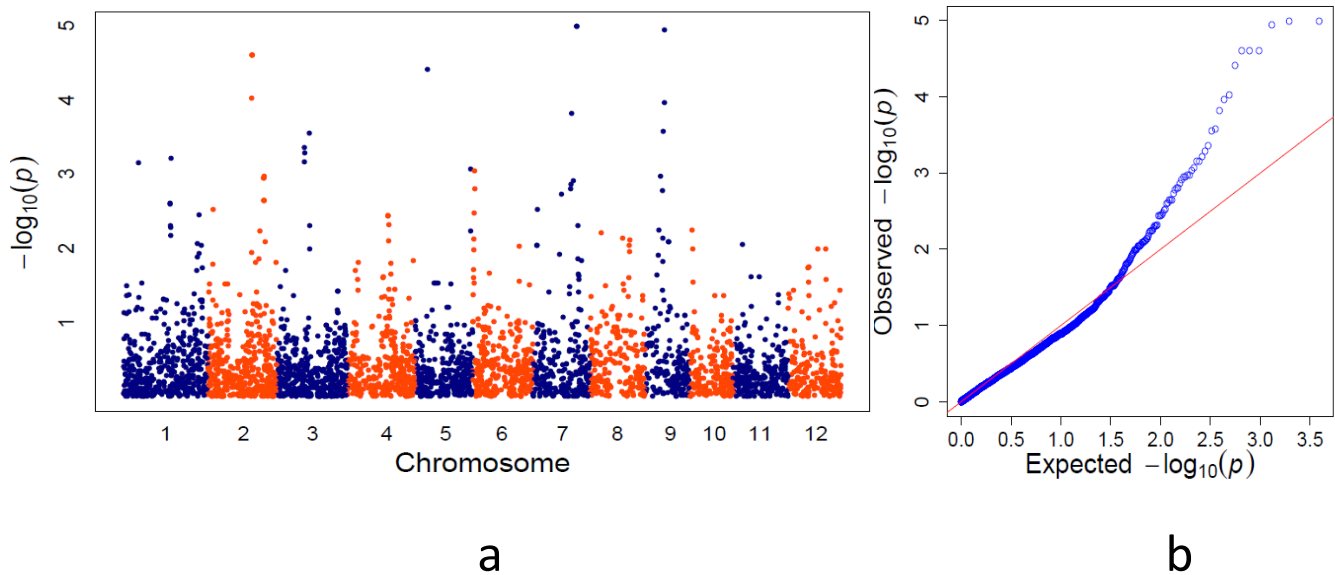

**Supplementary Figure S5.** Manhattan plot (a) and corresponding quantile-quantile plots (b) of  $p$ -values analyzed using mixed model for spikelet fertility under control.

### CMLM for unfilled grains under control

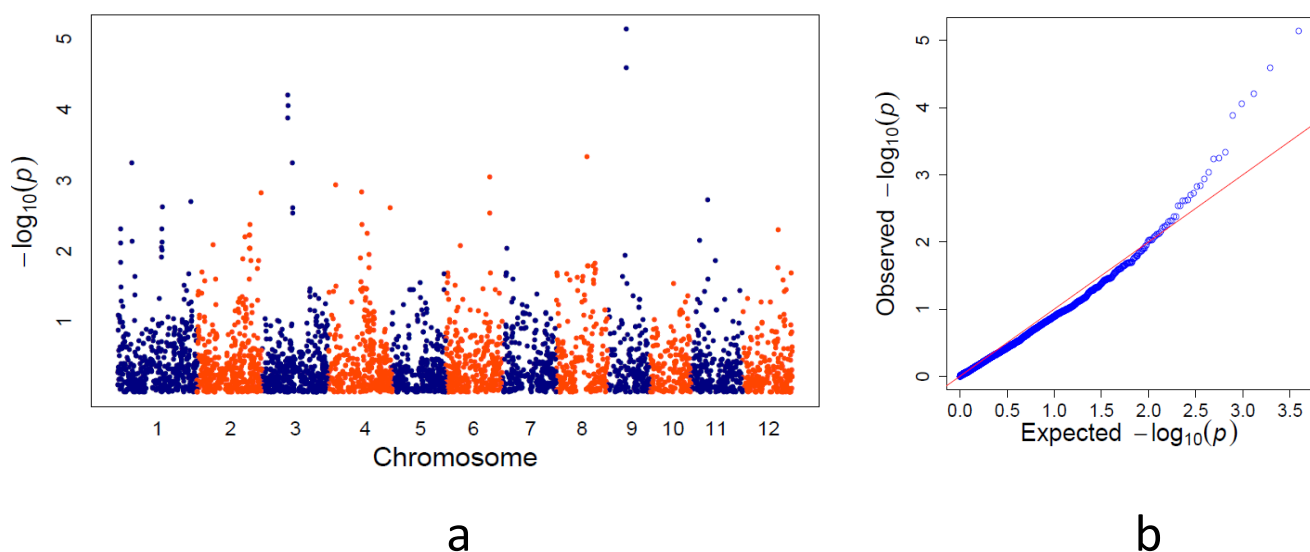

**Supplementary Figure S6.** Manhattan plot (a) and corresponding quantile-quantile plots (b) of  $p$ -values analyzed using mixed model for unfilled grains under control.

### CMLM for $\text{Na}^+$ content under stress

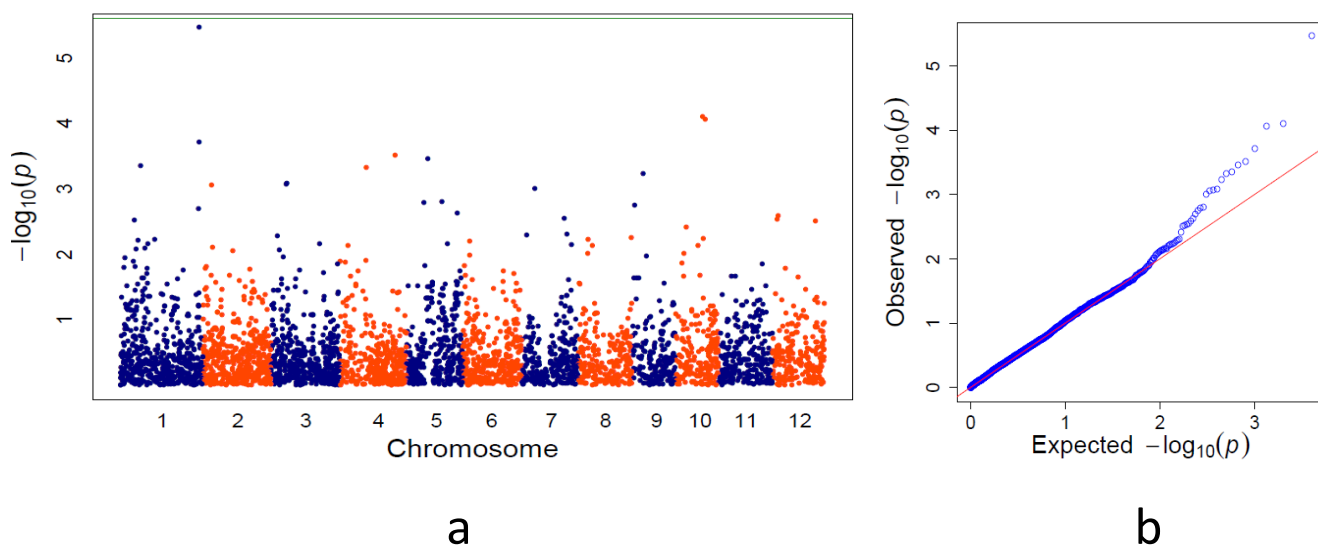

**Supplementary Figure S7.** Manhattan plot (a) and corresponding quantile-quantile plots (b) of  $p$ -values analyzed using mixed model for  $\text{Na}^+$  content under stress.



### CMLM for spikelet fertility under stress

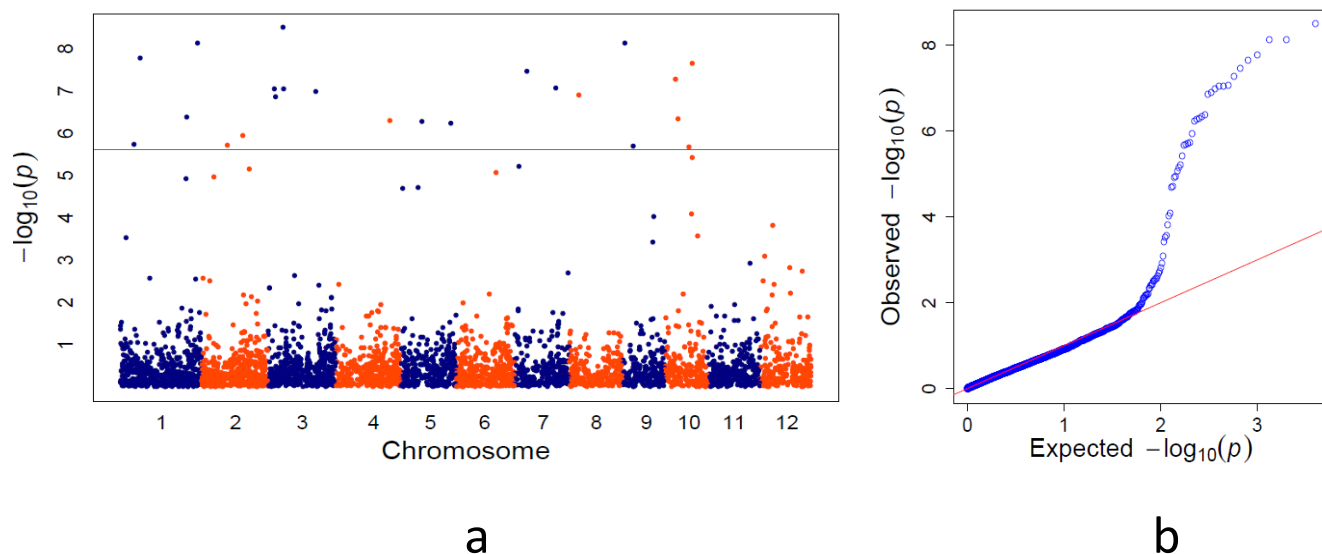

**Supplementary Figure S8.** Manhattan plot (a) and corresponding quantile-quantile plots (b) of  $p$ -values analyzed using mixed model for spikelet fertility under stress.

### CMLM for spikelet fertility SSI

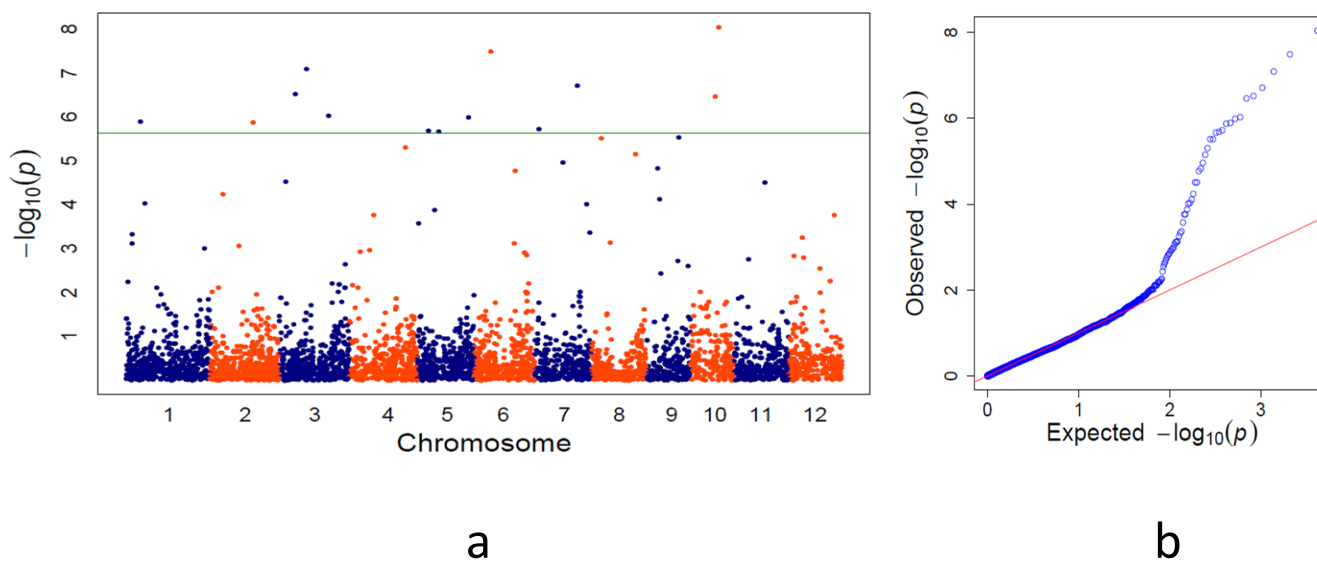

**Supplementary Figure S9.** Manhattan plot (a) and corresponding quantile-quantile plots (b) of  $p$ -values analyzed using mixed model for spikelet fertility SSI.

## CMLM for filled grains under stress

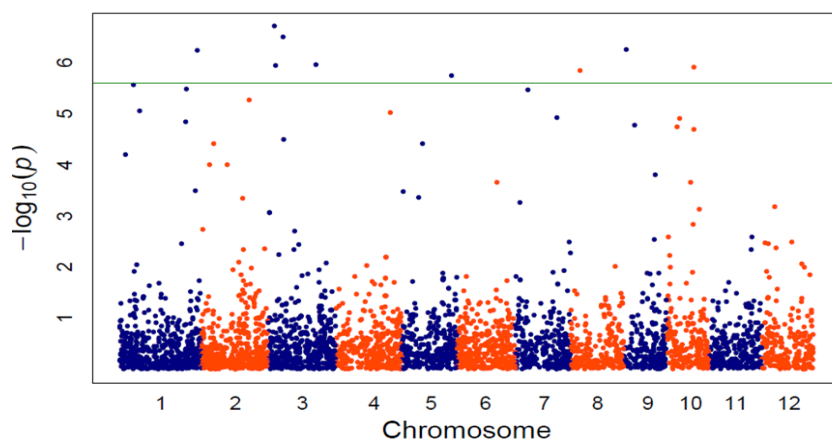

a

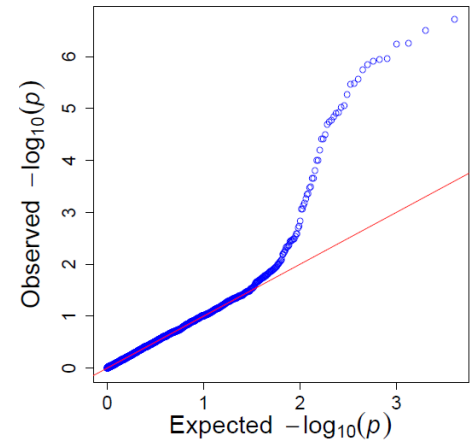

b

**Supplementary Figure S10.** Manhattan plot (a) and corresponding quantile-quantile plots (b) of  $p$ -values analyzed using mixed model for filled grains under stress.

## CMLM for productive tillers under stress

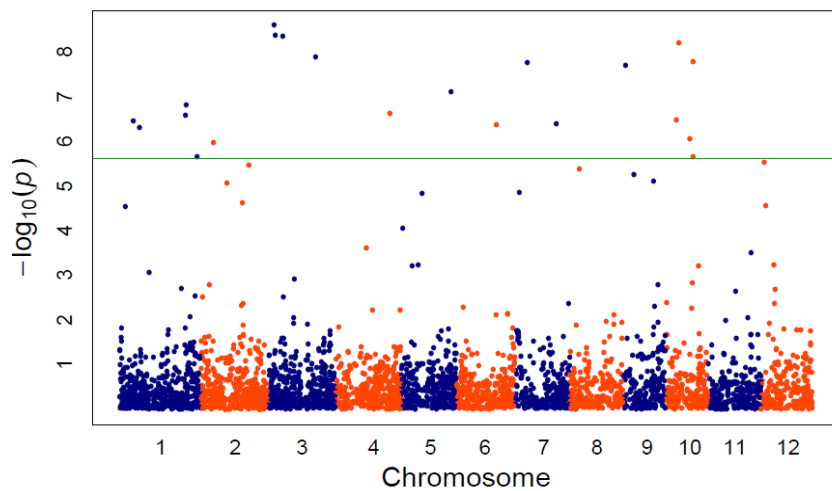

a

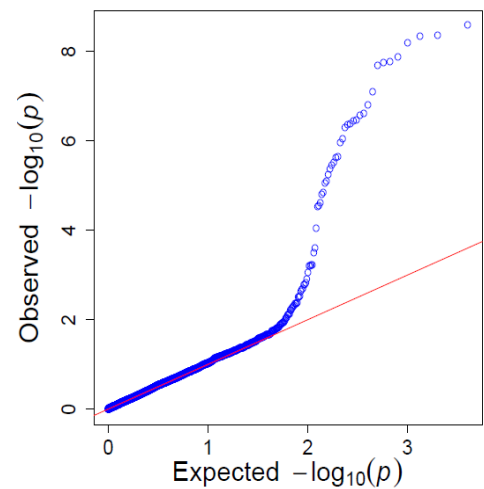

b

**Supplementary Figure S11.** Manhattan plot (a) and corresponding quantile-quantile plots (b) of  $p$ -values analyzed using mixed model for productive tillers under stress.

## CMLM for yield/plant under stress

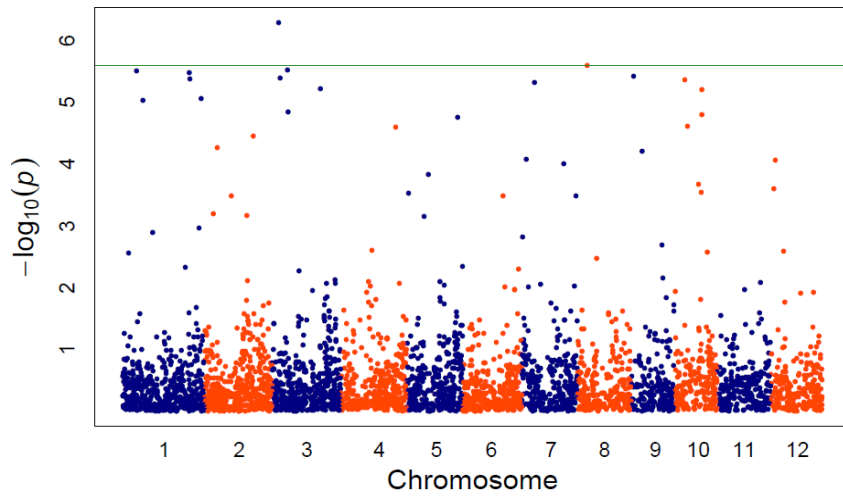

a

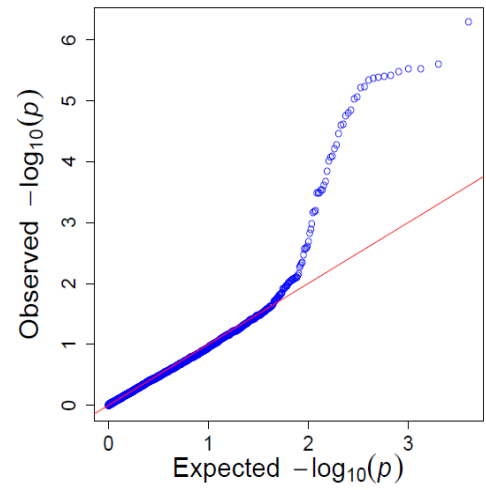

b

**Supplementary Figure S12.** Manhattan plot (a) and corresponding quantile-quantile plots (b) of  $p$ -values analyzed using mixed model for yield/plant under stress.
